# Supplementary material for: Effects of Social Deprivation on the Proportion of Preemptive Kidney Transplantation: A Mediation Analysis
Source: PubMed Central journal article supplement — Transplant Direct. 2021 Sep 7;7(10):e750. doi: 10.1097/TXD.0000000000001203 (PMC9771216; doi:10.1097/txd.0000000000001203), 2021-09-07
Supplement: txd-7-e750-s001.pdf [file txd-7-e750-s001.pdf]

## SUPPLEMENTAL DIGITAL CONTENT

### SUPPLEMENTARY MATERIALS AND METHODS

#### *Potential confounders and mediators*

##### *Potential confounders*

- (i) Age at the time of transplantation. In France in 2017, the median age of renal graft recipients was 51.4 years [4-85] for preemptive kidney transplantation (PKT) versus 55.1 years [1.8-87] for non-PKT.<sup>54</sup> Age under 60 years is associated with quintile 5 of the EDI.<sup>16</sup> Moreover, age is independently associated with deceased-donor PKT.<sup>55</sup>
- (ii) Gender. In France in 2017, 35.7% of PKT was performed in women versus 64.3% in men.<sup>54</sup> Female gender is associated with quintile 5 of the EDI.<sup>16</sup> Female gender is also associated with deceased-donor PKT.<sup>55</sup>
- (iii) Diabetes. We assumed that a chronic disease, such as diabetes mellitus, increases social inequalities in health, but social deprivation is also a known risk factor for diabetes mellitus.<sup>56</sup> Moreover, diabetes is associated with a reduced risk of PKT.<sup>57</sup>
- (iv) The underlying nephropathy. We assumed that underlying nephropathies, such as diabetic or vascular nephropathies, are associated with the most deprived patients and affect access to PKT.<sup>55</sup>

##### *Potential mediators*

We hypothesized that the association between deprivation and PKT could be affected by the following mediators:

- (i) Living-donor kidney source. In France, LDKT represents 12% of the non-PKT, and 37% of PKT. The most deprived patients are less likely to receive a living-donor kidney and consequently less likely to undergo preemptive transplantation.<sup>7</sup> Living donor transplantation was considered as a proxy of organ donation process.
- (ii) Positive cytomegalovirus (CMV) serology. Lower socioeconomic status is associated with positive CMV serology.<sup>58</sup> CMV is independently associated with an increased risk of cardiovascular disease.<sup>50</sup>
- (iii) Positive human leukocyte antigens (HLA) antibodies. The most deprived recipients have an increased risk of HLA immunization.<sup>59</sup> HLA antibodies increase the time spent on the transplant waiting list and reduce the likelihood of preemptive transplantation.<sup>60,61</sup>
- (iv) Blood group. In France, blood groups A and O represent 44% and 42% of the general population respectively, whereas only 10% of the population has group B. However, ABO blood group distribution differs according to country and continent. The non-European population more frequently belongs to the most deprived group and has blood group B than the European population.<sup>62</sup> In 2018, the ABM reported that patients with blood groups B and O patients have a more difficult access to transplantation in France. The non-O blood groups are associated with deceased-donor PKT.<sup>55</sup>
- (v) Hepatitis C virus (HCV) infection. HCV infection is more frequent in socially deprived patients.<sup>51</sup> We hypothesized that positive hepatitis C serology was associated with PKT.<sup>7,55</sup>

## SUPPLEMENTARY RESULTS

**Table S1.** Patient characteristics (complete cohort, quintile 5 of the European Deprivation Index versus others).

|                                | Quintiles 1 to 4<br>(N=5883) | Quintile 5<br>(N=2818) |
|--------------------------------|------------------------------|------------------------|
| <b>Patient characteristics</b> |                              |                        |
| <b>Age (years)</b>             |                              |                        |
| [18-30]                        | 439 (7%)                     | 246 (9%)               |
| [30-60]                        | 3167 (54%)                   | 1672 (59%)             |
| > 60                           | 2277 (39%)                   | 900 (32%)              |
| <b>Gender (male)</b>           | 3837 (65%)                   | 1714 (61%)             |
| <b>BMI (kg/m<sup>2</sup>)</b>  |                              |                        |
| < 20                           | 166 (3%)                     | 81 (3%)                |
| [20-25]                        | 2886 (49%)                   | 1317 (47%)             |
| > 25                           | 2831 (48%)                   | 1420 (50%)             |
| <b>Underlying nephropathy</b>  |                              |                        |
| Diabetic                       | 527 (9%)                     | 368 (13%)              |
| Glomerulonephritis             | 1430 (24%)                   | 549 (19%)              |
| Interstitial nephritis         | 526 (9%)                     | 263 (9%)               |
| PKD (ref)                      | 1267 (22%)                   | 383 (14%)              |
| Systemic disease               | 210 (4%)                     | 92 (3%)                |
| Uropathy                       | 149 (3%)                     | 55 (2%)                |
| Vascular                       | 530 (9%)                     | 336 (12%)              |
| Miscellaneous                  | 304 (5%)                     | 173 (6%)               |
| Unknown                        | 940 (16%)                    | 599 (21%)              |
| <b>Diabetes</b>                | 912 (16%)                    | 554 (20%)              |
| <b>Cardiovascular disease</b>  | 1376 (23%)                   | 665 (24%)              |
| <b>Tobacco (smoker)</b>        | 3030 (52%)                   | 1351 (48%)             |
| <b>Hypertension</b>            | 4001 (68%)                   | 1947 (69%)             |

*(Continues)*

**Table S1.** Patient characteristics (complete cohort, quintile 5 of the European Deprivation Index versus others).

|                                                | <b>Quintiles 1 to 4</b><br>(N=5883) | <b>Quintile 5</b><br>(N=2818) |
|------------------------------------------------|-------------------------------------|-------------------------------|
| <b>Positive hepatitis C serology</b>           | 120 (3%)                            | 102 (4%)                      |
| <b>Positive CMV serology</b>                   | 3105 (53%)                          | 2042 (72%)                    |
| <b>Positive EBV serology</b>                   | 5616 (95%)                          | 2713 (96%)                    |
| <b>HLA antibody class I and/or II &gt; 0%</b>  | 1275 (22%)                          | 701 (25%)                     |
| <b>Blood group</b>                             |                                     |                               |
| <b>B</b>                                       | 617 (10%)                           | 426 (15%)                     |
| <b>Others</b>                                  | 5266 (90%)                          | 2392 (85%)                    |
| <b>Transplantation characteristics</b>         |                                     |                               |
| <b>Donor source (living donor)</b>             | 899 (15%)                           | 326 (12%)                     |
| <i>Preemptive living donor transplantation</i> | 371 (41%)                           | 107 (33%)                     |
| <b>Preemptive registration</b>                 | 2236 (38%)                          | 790 (28%)                     |
| <b>Preemptive transplantation</b>              | 1067 (18%)                          | 330 (12%)                     |

**Table S2.** Bivariate analysis (logistic regression). Factors associated with each quintile of the European Deprivation Index.

|                                     | Quintile 1*      | Quintile 2*      | Quintile 3*      | Quintile 4*      | Quintile 5*      |
|-------------------------------------|------------------|------------------|------------------|------------------|------------------|
| Patient characteristics<br>(N=2818) | OR [95% CI]      |
| Age (years)                         |                  |                  |                  |                  |                  |
| [18-30]                             | ref              | ref              | ref              | ref              | ref              |
| [30-60]                             | 1.07 [0.85-1.37] | 1.17 [0.93-1.47] | 1.07 [0.86-1.33] | 0.86 [0.71-1.06] | 0.94 [0.80-1.11] |
| > 60                                | 1.34 [1.06-1.72] | 1.13 [0.90-1.44] | 1.20 [0.96-1.50] | 0.98 [0.80-1.21] | 0.71 [0.59-0.84] |
| Gender (female)                     | 0.90 [0.79-1.02] | 0.88 [0.78-0.99] | 0.94 [0.84-1.06] | 0.98 [0.88-1.10] | 1.21 [1.10-1.33] |
| BMI (kg/m <sup>2</sup> )            |                  |                  |                  |                  |                  |
| < 20                                | 0.95 [0.65-1.35] | 0.86 [0.59-1.23] | 1.11 [0.79-1.53] | 0.97 [0.70-1.33] | 1.07 [0.81-1.40] |
| [20-25]                             | ref              | ref              | ref              | ref              | ref              |
| > 25                                | 0.91 [0.81-1.03] | 1.00 [0.89-1.12] | 1.05 [0.94-1.18] | 0.90 [0.81-1.00] | 1.10 [1.00-1.20] |
| Underlying nephropathy              |                  |                  |                  |                  |                  |
| Diabetic                            | 0.59 [0.46-0.75] | 0.63 [0.50-0.79] | 0.76 [0.61-0.94] | 0.92 [0.75-1.13] | 2.31 [1.94-2.75] |
| Glomerulonephritis                  | 0.87 [0.73-1.04] | 0.89 [0.75-1.05] | 0.95 [0.80-1.12] | 1.00 [0.85-1.18] | 1.27 [1.09-1.48] |
| Interstitial nephritis              | 0.70 [0.55-0.89] | 0.79 [0.63-0.99] | 0.93 [0.74-1.15] | 0.94 [0.76-1.16] | 1.65 [1.37-1.99] |
| PKD                                 | ref              | ref              | ref              | ref              | ref              |
| Systemic disease                    | 0.78 [0.55-1.10] | 0.77 [0.55-1.07] | 1.03 [0.75-1.39] | 0.96 [0.70-1.29] | 1.45 [1.10-1.89] |
| Uropathy                            | 0.78 [0.51-1.16] | 0.91 [0.61-1.31] | 0.89 [0.60-1.29] | 1.18 [0.83-1.66] | 1.22 [0.87-1.69] |
| Vascular                            | 0.85 [0.68-1.07] | 0.63 [0.50-0.79] | 0.75 [0.60-0.93] | 0.82 [0.66-1.01] | 2.10 [1.75-2.51] |
| Miscellaneous                       | 0.85 [0.64-1.12] | 0.63 [0.47-0.84] | 0.84 [0.64-1.09] | 0.88 [0.67-1.14] | 1.88 [1.51-2.34] |
| Unknown                             | 0.68 [0.56-0.83] | 0.62 [0.51-0.75] | 0.79 [0.66-0.95] | 0.95 [0.79-1.13] | 2.11 [1.81-2.46] |
| Diabetes                            | 0.85 [0.72-1.00] | 0.96 [0.82-1.12] | 0.84 [0.72-0.98] | 0.90 [0.78-1.04] | 1.33 [1.19-1.50] |
| Cardiovascular disease              | 1.01 [0.88-1.16] | 1.01 [0.88-1.15] | 1.05 [0.92-1.19] | 0.93 [0.81-1.05] | 1.01 [0.91-1.12] |
| Tobacco (smoker)                    | 0.99 [0.88-1.11] | 1.00 [0.89-1.12] | 0.97 [0.87-1.08] | 1.07 [0.96-1.19] | 0.98 [0.89-1.07] |
| Hypertension                        | 1.05 [0.93-1.20] | 1.00 [0.89-1.14] | 0.98 [0.87-1.10] | 0.91 [0.81-1.02] | 1.05 [0.95-1.16] |

|                                     |                  |                  |                  |                  |                  |
|-------------------------------------|------------------|------------------|------------------|------------------|------------------|
| Positive hepatitis C serology       | 0.77 [0.50-1.14] | 0.98 [0.67-1.40] | 0.41 [0.24-0.64] | 0.93 [0.65-1.30] | 1.80 [1.38-2.36] |
| Positive CMV serology               | 0.57 [0.51-0.64] | 0.66 [0.59-0.74] | 0.76 [0.68-0.85] | 0.94 [0.84-1.05] | 2.35 [2.14-2.60] |
| HLA antibody class I and/or II > 0% | 0.91 [0.79-1.04] | 0.91 [0.79-1.03] | 0.96 [0.85-1.09] | 0.96 [0.85-1.08] | 1.19 [1.07-1.31] |
| Blood group                         |                  |                  |                  |                  |                  |
| B                                   | 0.84 [0.69-1.02] | 0.86 [0.71-1.03] | 0.92 [0.77-1.09] | 0.73 [0.61-0.87] | 1.52 [1.33-1.73] |
| Others                              | ref              | ref              | ref              | ref              | ref              |
| Donor source (living donor)         | 1.24 [1.05-1.46] | 1.18 [1.00-1.38] | 1.03 [0.88-1.20] | 1.08 [0.92-1.25] | 0.73 [0.63-0.83] |
| Preemptive kidney transplantation   | 1.36 [1.16-1.58] | 1.31 [1.13-1.51] | 1.12 [0.96-1.29] | 1.06 [0.92-1.22] | 0.60 [0.52-0.68] |

\* For each quintile, reference class was the other quintiles.

**Table S3.** Bivariate analysis (logistic regression). Factors associated with preemptive registration.

| <b>Preemptive registration</b> |                    |
|--------------------------------|--------------------|
| N = 3026                       |                    |
| <b>Patient characteristics</b> | <b>OR [95% CI]</b> |
| Age (years)                    |                    |
| [18-30]                        | ref                |
| [30-60]                        | 1.01 [0.85-1.19]   |
| > 60                           | 0.75 [0.63-0.89]   |
| Gender (female)                | 1.26 [1.15-1.38]   |
| BMI (kg/m <sup>2</sup> )       |                    |
| < 20                           | 1.13 [0.87-1.47]   |
| [20-25]                        | ref                |
| > 25                           | 0.89 [0.82-0.98]   |
| Underlying nephropathy         |                    |
| Diabetic                       | 0.23 [0.19-0.28]   |
| Glomerulonephritis             | 0.50 [0.44-0.57]   |
| Interstitial nephritis         | 0.62 [0.52-0.73]   |
| PKD                            | ref                |
| Systemic disease               | 0.18 [0.13-0.25]   |
| Uropathy                       | 0.79 [0.59-1.06]   |
| Vascular                       | 0.30 [0.25-0.35]   |
| Miscellaneous                  | 0.39 [0.31-0.49]   |
| Unknown                        | 0.34 [0.29-0.39]   |
| Diabetes                       | 0.52 [0.45-0.59]   |
| Cardiovascular disease         | 0.48 [0.43-0.54]   |
| Tobacco (smoker)               | 0.80 [0.73-0.88]   |
| Hypertension                   | 0.88 [0.80-0.96]   |
| Positive hepatitis C serology  | 0.40 [0.28-0.56]   |
| Positive CMV serology          | 0.75 [0.68-0.81]   |

|                                        |                  |
|----------------------------------------|------------------|
| HLA antibody class I and/or<br>II > 0% | 0.95 [0.86-1.05] |
| Blood group                            |                  |
| B                                      | 0.86 [0.74-0.98] |
| Others                                 | ref              |
| Donor source (living donor)            | 2.69 [2.38-3.04] |
| EDI (quintile 5)                       | 0.64 [0.58-0.70] |

---



**Table S4.** Mediation analyses: effects of social deprivation on preemptive registration (one mediator at a time).

|                                | Living-donor transplantation |               | Positive CMV serology |               | HLA immunization |               | Positive hepatitis C serology |               | Blood group B |               |
|--------------------------------|------------------------------|---------------|-----------------------|---------------|------------------|---------------|-------------------------------|---------------|---------------|---------------|
|                                | OR                           | 95% CI        | OR                    | 95% CI        | OR               | 95% CI        | OR                            | 95% CI        | OR            | 95% CI        |
| <b>Natural Direct Effect</b>   | 0.71                         | [0.65-0.79]** | 0.70                  | [0.63-0.78]** | 0.69             | [0.62-0.76]** | 0.69                          | [0.62-0.77]** | 0.69          | [0.62-0.76]** |
| <b>Natural Indirect Effect</b> | 0.96                         | [0.94-0.98]** | 0.98                  | [0.96-0.99]*  | 1.00             | [0.99-1.00]   | 0.99                          | [0.99-1.00]*  | 1.00          | [0.99-1.00]   |
| <b>Total Effect</b>            | 0.68                         | [0.62-0.76]** | 0.68                  | [0.62-0.76]** | 0.68             | [0.62-0.76]** | 0.68                          | [0.62-0.76]** | 0.68          | [0.62-0.75]** |

The analyses were adjusted for confounders: age, sex, diabetes and underlying nephropathy.

\*  $p < 0.05$

\*\*  $p < 0.001$

**Table S5.** Sequential mediation analyses: effects of social deprivation on preemptive registration.

|                                | <b>Model 1</b> |               | <b>Model 2</b> |               | <b>Model 3</b> |               | <b>Model 4</b> |               | <b>Model 5</b> |               |
|--------------------------------|----------------|---------------|----------------|---------------|----------------|---------------|----------------|---------------|----------------|---------------|
|                                | OR             | 95% CI        |
| <b>Natural Direct Effect</b>   | 0.71           | [0.64-0.79]** | 0.73           | [0.66-0.81]** | 0.73           | [0.66-0.81]** | 0.73           | [0.66-0.81]** | 0.74           | [0.67-0.82]** |
| <b>Natural Indirect Effect</b> | 0.96           | [0.95-0.98]** | 0.94           | [0.92-0.96]*  | 0.94           | [0.92-0.96]   | 0.93           | [0.91-0.96]*  | 0.93           | [0.91-0.95]   |
| <b>Total Effect</b>            | 0.69           | [0.62-0.76]** | 0.69           | [0.62-0.76]** | 0.69           | [0.62-0.76]** | 0.69           | [0.62-0.76]** | 0.69           | [0.62-0.76]** |

The analyses were adjusted for confounders: age, sex, diabetes and underlying nephropathy.

*Model 1:* mediation analysis with a single mediator – living-donor transplantation.

*Model 2:* mediation analysis with two mediators – living-donor transplantation and positive CMV serology.

*Model 3:* mediation analysis with three mediators – living-donor transplantation, positive CMV serology and HLA immunization.

*Model 4:* mediation analysis with four mediators – living-donor transplantation, positive CMV serology, HLA immunization and positive hepatitis C serology.

*Model 5:* complete mediation analysis with the five mediators described in the DAG – living-donor transplantation, positive CMV serology, HLA immunization, positive hepatitis C serology and blood group.

**Table S6.** Multivariable analyses stratified by donor type.

|                               | Complete cohort<br>N = 8701               |                                              | Living donor kidney transplantation<br>N = 1225 (14%) |                                             | Deceased donor kidney transplantation<br>N = 7476 (86%) |                                             |
|-------------------------------|-------------------------------------------|----------------------------------------------|-------------------------------------------------------|---------------------------------------------|---------------------------------------------------------|---------------------------------------------|
|                               | Preemptive registration<br>N = 3026 (35%) | Preemptive transplantation<br>N = 1397 (16%) | Preemptive registration<br>N = 676 (55%)              | Preemptive transplantation<br>N = 478 (39%) | Preemptive registration<br>N = 2350 (31%)               | Preemptive transplantation<br>N = 919 (12%) |
| Patient characteristics       | OR [95% CI]                               | OR [95% CI]                                  | OR [95% CI]                                           | OR [95% CI]                                 | OR [95% CI]                                             | OR [95% CI]                                 |
| Age (years)                   |                                           |                                              |                                                       |                                             |                                                         |                                             |
| [18-30]                       | ref                                       | ref                                          | ref                                                   | ref                                         | ref                                                     | ref                                         |
| [30-60]                       | 1.04 [0.87-1.25]                          | 0.79 [0.64-0.98]                             | 1.33 [0.96-1.84]                                      | 1.06 [0.76-1.84]                            | 1.18 [0.94-1.48]                                        | 1.07 [0.78-1.49]                            |
| > 60                          | 0.91 [0.75-1.10]                          | 0.84 [0.67-1.06]                             | 1.13 [0.72-1.76]                                      | 1.04 [0.66-1.64]                            | 1.14 [0.90-1.45]                                        | 1.46 [1.06-2.06]                            |
| Gender (female)               | 0.85 [0.77-0.95]                          | 0.90 [0.79-1.03]                             | 0.90 [0.69-1.17]                                      | 0.96 [0.74-1.25]                            | 0.82 [0.73-0.92]                                        | 0.82 [0.70-0.96]                            |
| BMI (kg/m <sup>2</sup> )      |                                           |                                              |                                                       |                                             |                                                         |                                             |
| < 20                          | 1.15 [0.87-1.51]                          | 0.97 [0.67-1.36]                             | 1.47 [0.79-2.76]                                      | 1.24 [0.66-2.28]                            | 1.10 [0.80-1.51]                                        | 0.84 [0.51-1.32]                            |
| [20-25]                       | ref                                       | ref                                          | ref                                                   | ref                                         | ref                                                     | ref                                         |
| > 25                          | 1.02 [0.93-1.12]                          | 1.04 [0.92-1.17]                             | 1.24 [0.96-1.61]                                      | 1.31 [1.01-1.70]                            | 0.99 [0.89-1.11]                                        | 0.98 [0.85-1.14]                            |
| Underlying nephropathy        |                                           |                                              |                                                       |                                             |                                                         |                                             |
| Diabetic                      | 0.34 [0.26-0.44]                          | 0.66 [0.47-0.92]                             | 0.35 [0.16-0.79]                                      | 0.62 [0.27-1.42]                            | 0.34 [0.26-0.44]                                        | 0.69 [0.47-1.02]                            |
| Glomerulonephritis            | 0.52 [0.45-0.60]                          | 0.70 [0.59-0.83]                             | 0.37 [0.25-0.53]                                      | 0.51 [0.36-0.72]                            | 0.53 [0.46-0.62]                                        | 0.73 [0.59-0.90]                            |
| Interstitial nephritis        | 0.64 [0.54-0.77]                          | 0.97 [0.79-1.20]                             | 0.67 [0.39-1.14]                                      | 0.97 [0.60-1.59]                            | 0.66 [0.55-0.80]                                        | 1.09 [0.84-1.39]                            |
| PKD                           | ref                                       | ref                                          | ref                                                   | ref                                         | ref                                                     | ref                                         |
| Systemic disease              | 0.18 [0.13-0.25]                          | 0.31 [0.19-0.47]                             | 0.26 [0.13-0.51]                                      | 0.39 [0.19-0.78]                            | 0.15 [0.10-0.22]                                        | 0.24 [0.12-0.42]                            |
| Uropathy                      | 0.75 [0.55-1.01]                          | 1.12 [0.78-1.57]                             | 0.55 [0.29-1.06]                                      | 0.77 [0.42-1.41]                            | 0.75 [0.53-1.07]                                        | 1.20 [0.75-1.86]                            |
| Vascular                      | 0.36 [0.30-0.44]                          | 0.55 [0.43-0.71]                             | 0.22 [0.13-0.38]                                      | 0.38 [0.21-0.66]                            | 0.39 [0.32-0.48]                                        | 0.64 [0.48-0.84]                            |
| Miscellaneous                 | 0.43 [0.34-0.53]                          | 0.73 [0.55-0.96]                             | 0.30 [0.17-0.51]                                      | 0.38 [0.21-0.66]                            | 0.44 [0.34-0.56]                                        | 0.89 [0.64-1.22]                            |
| Unknown                       | 0.38 [0.33-0.44]                          | 0.58 [0.47-0.70]                             | 0.25 [0.17-0.39]                                      | 0.36 [0.24-0.55]                            | 0.41 [0.34-0.48]                                        | 0.66 [0.53-0.84]                            |
| Diabetes                      | 0.88 [0.73-1.05]                          | 0.73 [0.56-0.93]                             | 0.81 [0.43-1.51]                                      | 0.77 [0.39-1.47]                            | 0.91 [0.74-1.10]                                        | 0.74 [0.56-0.98]                            |
| Cardiovascular disease        | 0.56 [0.40-0.82]                          | 0.59 [0.50-0.70]                             | 0.57 [0.40-0.82]                                      | 0.64 [0.43-0.93]                            | 0.57 [0.50-0.65]                                        | 0.62 [0.51-0.75]                            |
| Tobacco (smoker)              | 0.91 [0.83-1.00]                          | 0.88 [0.78-0.99]                             | 0.88 [0.69-1.12]                                      | 0.88 [0.69-1.12]                            | 0.92 [0.83-1.03]                                        | 0.90 [0.77-1.04]                            |
| Hypertension                  | 1.04 [0.94-1.15]                          | 1.03 [0.91-1.18]                             | 1.05 [0.81-1.35]                                      | 0.91 [0.70-1.17]                            | 1.04 [0.93-1.17]                                        | 1.09 [0.94-1.28]                            |
| Positive hepatitis C serology | 0.47 [0.33-0.67]                          | 0.53 [0.31-0.84]                             | 0.86 [0.32-2.25]                                      | 0.63 [0.20-1.72]                            | 0.44 [0.29-0.64]                                        | 0.53 [0.28-0.91]                            |
| Positive CMV serology         | 0.88 [0.80-0.97]                          | 0.88 [0.78-0.99]                             | 0.94 [0.74-1.21]                                      | 0.86 [0.67-1.10]                            | 0.87 [0.77-0.97]                                        | 0.90 [0.78-1.04]                            |

|                                        |                         |                         |                         |                         |                         |                         |
|----------------------------------------|-------------------------|-------------------------|-------------------------|-------------------------|-------------------------|-------------------------|
| HLA antibody class I and/or II<br>> 0% | 0.91 [0.81-1.01]        | 0.75 [0.65-0.87]        | 0.92 [0.69-1.23]        | 0.91 [0.67-1.21]        | 0.93 [0.83-1.05]        | 0.75 [0.63-0.89]        |
| Blood group<br>B<br>Others             | 0.92 [0.80-1.06]<br>ref | 0.80 [0.66-0.97]<br>ref | 0.85 [0.60-1.20]<br>ref | 0.96 [0.67-1.36]<br>ref | 0.91 [0.77-1.07]<br>ref | 0.68 [0.53-0.87]<br>ref |
| EDI (quintile 5)                       | 0.71 [0.64-0.78]        | 0.66 [0.57-0.76]        | 0.82 [0.63-1.08]        | 0.78 [0.59-1.04]        | 0.71 [0.64-0.80]        | 0.67 [0.57-0.79]        |

**SUPPLEMENTARY REFERENCES** (*only related to the supplementary Materials and Methods paragraph*)

54. Agence de la Biomedecine. Registre Épidémiologie et Information en Néphrologie. Rapport annuel REIN 2017. <https://www.agence-biomedecine.fr/IMG/pdf/rapportrein2017.pdf>. Accessed April, 2019.
55. Grams ME, Chen BP-H, Coresh J, Segev DL. Preemptive deceased donor kidney transplantation: Considerations of equity and utility. *Clin J Am Soc Nephrol*. 2013;8(4):575–582.
56. Agardh E, Allebeck P, Hallqvist J, Moradi T, Sidorchuk A. Type 2 diabetes incidence and socio-economic position: A systematic review and meta-analysis. *Int J Epidemiol*. 2011;40(3):804–818.
57. Jay CL, Dean PG, Helmick RA, Stegall MD. Reassessing preemptive kidney transplantation in the United States: Are we making progress? *Transplantation*. 2016;100(5):1120–1127.
58. Cannon MJ, Schmid DS, Hyde TB. Review of cytomegalovirus seroprevalence and demographic characteristics associated with infection. *Rev Med Virol*. 2010;20(4):202–213.
59. Axelrod DA, Dzebisashvili N, Schnitzler MA, et al. The interplay of socioeconomic status, distance to center, and interdonor service area travel on kidney transplant access and outcomes. *Clin J Am Soc Nephrol*. 2010;5(12):2276–2288.
60. Heemann U, Oberbauer R, Sprangers B, Gökalp C, Bemelman F. Deceased donor kidney allocation schemes and international exchange. *Curr Opin Organ Transplant*. 2020;25(1):66–73.

61. Lim WH, Chapman JR, Wong G. Peak panel reactive antibody, cancer, graft, and patient outcomes in kidney transplant recipients. *Transplantation*. 2015;99(5):1043–1050.
62. Laging M, Kal-van Gestel JA, van de Wetering J, Ijzermans JNM, Weimar W, Roodnat JJ. Understanding the influence of ethnicity and socioeconomic factors on graft and patient survival after kidney transplantation. *Transplantation*. 2014;98(9):974–978.
